# Supplementary material for: Validation of the Five Facet Mindfulness Questionnaire-Bangla Using Classical Test Theory and Item Response Theory
Source: Springer Nature journal article supplement (doi:10.1007/s12671-023-02240-2), 2023-10-31
Supplement: MOESM1 [file 26243356]

**Validation of the Five Facet Mindfulness Questionnaire-Bangla through Classical Test Theory and Item Response Theory**

**Supplementary Materials**



**Scoring:**

(Note: R = reverse-scored item)

| Facet              | Score                       |
|--------------------|-----------------------------|
| Observe            | 01+03+08+10+13+18+23+28     |
| Describe           | 04+19+24+29                 |
| Act with awareness | 02R+05R+09R+11R+15R+20R+26R |
| Non-judge          | 07R+17R+22R+27R             |
| Non-react          | 06+12+14+16+21+25           |

## Supplementary Tables

**Table S1**

Item fit Statistics for revised models with 37 items. Items 12 and 16 indicated misfit (RMSEA>.06) thus discarded.

| Items           | S- $\chi^2$ | df    | RMSEA | p      | Items           | S- $\chi^2$ | df    | RMSEA | p      |
|-----------------|-------------|-------|-------|--------|-----------------|-------------|-------|-------|--------|
| <b>Observe</b>  |             |       |       |        | Ritem28         | 129.65      | 52.00 | 0.05  | <0.001 |
| item1           | 95.75       | 65.00 | 0.03  | 0.01   | Ritem34         | 79.43       | 49.00 | 0.03  | <0.001 |
| item6           | 114.68      | 60.00 | 0.04  | <0.001 | Ritem38         | 162.79      | 76.00 | 0.05  | <0.001 |
| item11          | 146.39      | 55.00 | 0.06  | <0.001 | <b>Nonjudge</b> |             |       |       |        |
| item15          | 135.62      | 59.00 | 0.05  | <0.001 | Ritem3          | 55.27       | 49.00 | 0.02  | <0.001 |
| item20          | 115.41      | 57.00 | 0.04  | <0.001 | Ritem10         | 51.56       | 43.00 | 0.02  | <0.001 |
| item26          | 91.58       | 41.00 | 0.05  | <0.001 | Ritem17         | 77.08       | 36.00 | 0.05  | 0.25   |
| item31          | 75.78       | 53.00 | 0.03  | 0.02   | Ritem25         | 75.81       | 45.00 | 0.04  | 0.17   |
| item36          | 89.56       | 41.00 | 0.05  | <0.001 | Ritem30         | 97.86       | 45.00 | 0.05  | <0.001 |
| <b>Describe</b> |             |       |       |        | Ritem35         | 75.15       | 46.00 | 0.03  | <0.001 |
| item7           | 108.82      | 54.00 | 0.04  | <0.001 | Ritem39         | 75.74       | 48.00 | 0.03  | <0.001 |
| Ritem12         | 164.36      | 47.00 | 0.07  | <0.001 | <b>Nonreact</b> |             |       |       |        |
| Ritem16         | 124.05      | 41.00 | 0.07  | <0.001 | item4           | 109.15      | 52.00 | 0.05  | <0.001 |
| Ritem22         | 78.29       | 45.00 | 0.04  | <0.001 | item9           | 85.58       | 52.00 | 0.03  | 0.01   |
| item27          | 105.94      | 58.00 | 0.04  | <0.001 | item19          | 94.79       | 46.00 | 0.04  | <0.001 |
| item32          | 89.41       | 52.00 | 0.04  | <0.001 | item21          | 106.25      | 48.00 | 0.05  | <0.001 |
| item37          | 108.86      | 57.00 | 0.04  | <0.001 | item24          | 110.44      | 44.00 | 0.05  | <0.001 |
| <b>Actaware</b> |             |       |       |        | item29          | 102.82      | 47.00 | 0.05  | <0.001 |
| Ritem5          | 117.53      | 56.00 | 0.05  | <0.001 | item33          | 101.75      | 51.00 | 0.04  | <0.001 |
| Ritem8          | 150.42      | 55.00 | 0.06  | <0.001 |                 |             |       |       |        |
| Ritem13         | 108.42      | 55.00 | 0.04  | <0.001 |                 |             |       |       |        |
| Ritem18         | 91.73       | 58.00 | 0.03  | <0.001 |                 |             |       |       |        |
| Ritem23         | 96.69       | 51.00 | 0.04  | <0.001 |                 |             |       |       |        |

**Table S2**

*Item fit, item discrimination (a) and item difficulty parameters(b<sub>1</sub>-b<sub>4</sub>) of retained 35-items. Items 38 & 39 were outside the suggested limit of item discrimination.*

|                 | a    | b1    | b2    | b3    | b4   | S-X2   | df    | RMSEA | p      |
|-----------------|------|-------|-------|-------|------|--------|-------|-------|--------|
| <b>Observe</b>  |      |       |       |       |      |        |       |       |        |
| item1           | 0.90 | -3.09 | -1.85 | -0.12 | 1.41 | 95.75  | 65.00 | 0.03  | 0.01   |
| item6           | 1.39 | -1.62 | -0.77 | 0.26  | 1.25 | 114.68 | 60.00 | 0.04  | <0.001 |
| item11          | 1.47 | -1.95 | -0.81 | 0.24  | 1.66 | 146.39 | 55.00 | 0.06  | <0.001 |
| item15          | 1.29 | -2.10 | -1.06 | 0.09  | 1.25 | 135.62 | 59.00 | 0.05  | <0.001 |
| item20          | 1.45 | -2.38 | -1.54 | -0.53 | 0.65 | 115.41 | 57.00 | 0.04  | <0.001 |
| item26          | 1.66 | -3.25 | -2.47 | -1.24 | 0.39 | 91.58  | 41.00 | 0.05  | <0.001 |
| item31          | 1.43 | -2.66 | -1.63 | -0.26 | 1.23 | 75.78  | 53.00 | 0.03  | 0.02   |
| item36          | 1.89 | -2.58 | -1.62 | -0.44 | 1.07 | 89.56  | 41.00 | 0.05  | <0.001 |
| <b>Describe</b> |      |       |       |       |      |        |       |       |        |
| item7           | 1.94 | -1.98 | -1.16 | -0.04 | 1.10 | 75.91  | 29.00 | 0.06  | <0.001 |
| Ritem22         | 0.64 | -4.05 | -1.39 | 0.32  | 2.31 | 97.17  | 40.00 | 0.05  | <0.001 |
| item27          | 1.52 | -1.58 | -0.72 | 0.23  | 1.48 | 32.76  | 34.00 | 0.00  | 0.53   |
| item32          | 1.94 | -2.35 | -1.39 | -0.17 | 1.10 | 69.01  | 28.00 | 0.05  | <0.001 |
| item37          | 1.33 | -2.43 | -1.03 | -0.03 | 1.57 | 76.21  | 35.00 | 0.05  | <0.001 |
| <b>Actaware</b> |      |       |       |       |      |        |       |       |        |
| Ritem5          | 1.40 | -1.44 | 0.03  | 1.31  | 2.24 | 117.53 | 56.00 | 0.05  | <0.001 |
| Ritem8          | 1.70 | -2.37 | -0.81 | 0.15  | 0.85 | 150.42 | 55.00 | 0.06  | <0.001 |
| Ritem13         | 1.73 | -1.50 | -0.38 | 0.53  | 1.61 | 108.42 | 55.00 | 0.04  | <0.001 |
| Ritem18         | 1.44 | -2.52 | -0.88 | 0.27  | 1.57 | 91.73  | 58.00 | 0.03  | <0.001 |
| Ritem23         | 1.71 | -2.36 | -0.91 | 0.07  | 1.17 | 96.69  | 51.00 | 0.04  | <0.001 |
| Ritem28         | 1.93 | -1.99 | -0.91 | 0.16  | 1.05 | 129.65 | 52.00 | 0.05  | <0.001 |
| Ritem34         | 1.82 | -2.43 | -1.01 | -0.02 | 0.77 | 79.43  | 49.00 | 0.03  | <0.001 |
| Ritem38         | 0.40 | -4.28 | 0.31  | 3.41  | 5.95 | 162.79 | 76.00 | 0.05  | <0.001 |
| <b>Nonjudge</b> |      |       |       |       |      |        |       |       |        |
| Ritem3          | 0.73 | -1.07 | 0.99  | 2.59  | 4.11 | 55.27  | 49.00 | 0.02  | 0.25   |
| Ritem10         | 1.06 | -2.44 | -0.29 | 1.29  | 2.47 | 51.56  | 43.00 | 0.02  | 0.17   |
| Ritem17         | 1.04 | 0.54  | 1.41  | 3.39  | 4.39 | 77.08  | 36.00 | 0.05  | <0.001 |
| Ritem25         | 1.03 | -2.06 | -0.22 | 1.49  | 2.94 | 75.81  | 45.00 | 0.04  | <0.001 |
| Ritem30         | 1.28 | -1.42 | 0.09  | 1.22  | 2.23 | 97.86  | 45.00 | 0.05  | <0.001 |
| Ritem35         | 0.98 | -2.01 | -0.04 | 1.47  | 2.65 | 75.15  | 46.00 | 0.03  | <0.001 |
| Ritem39         | 0.56 | -2.24 | 0.92  | 2.95  | 5.53 | 75.74  | 48.00 | 0.03  | 0.01   |
| <b>Nonreact</b> |      |       |       |       |      |        |       |       |        |
| item4           | 0.82 | -3.30 | -1.97 | 0.14  | 2.28 | 109.15 | 52.00 | 0.05  | <0.001 |
| item9           | 0.97 | -2.92 | -1.42 | 0.07  | 2.04 | 85.58  | 52.00 | 0.03  | <0.001 |
| item19          | 1.10 | -3.30 | -2.16 | -0.67 | 1.33 | 94.79  | 46.00 | 0.04  | <0.001 |
| item21          | 1.18 | -2.36 | -1.16 | 0.05  | 1.82 | 106.25 | 48.00 | 0.05  | <0.001 |
| item24          | 1.56 | -2.06 | -1.08 | -0.05 | 1.49 | 110.44 | 44.00 | 0.05  | <0.001 |
| item29          | 0.99 | -2.90 | -1.15 | 0.71  | 3.07 | 102.82 | 47.00 | 0.05  | <0.001 |
| item33          | 1.05 | -2.87 | -1.39 | 0.37  | 2.31 | 101.75 | 51.00 | 0.04  | <0.001 |

## Supplementary Figures

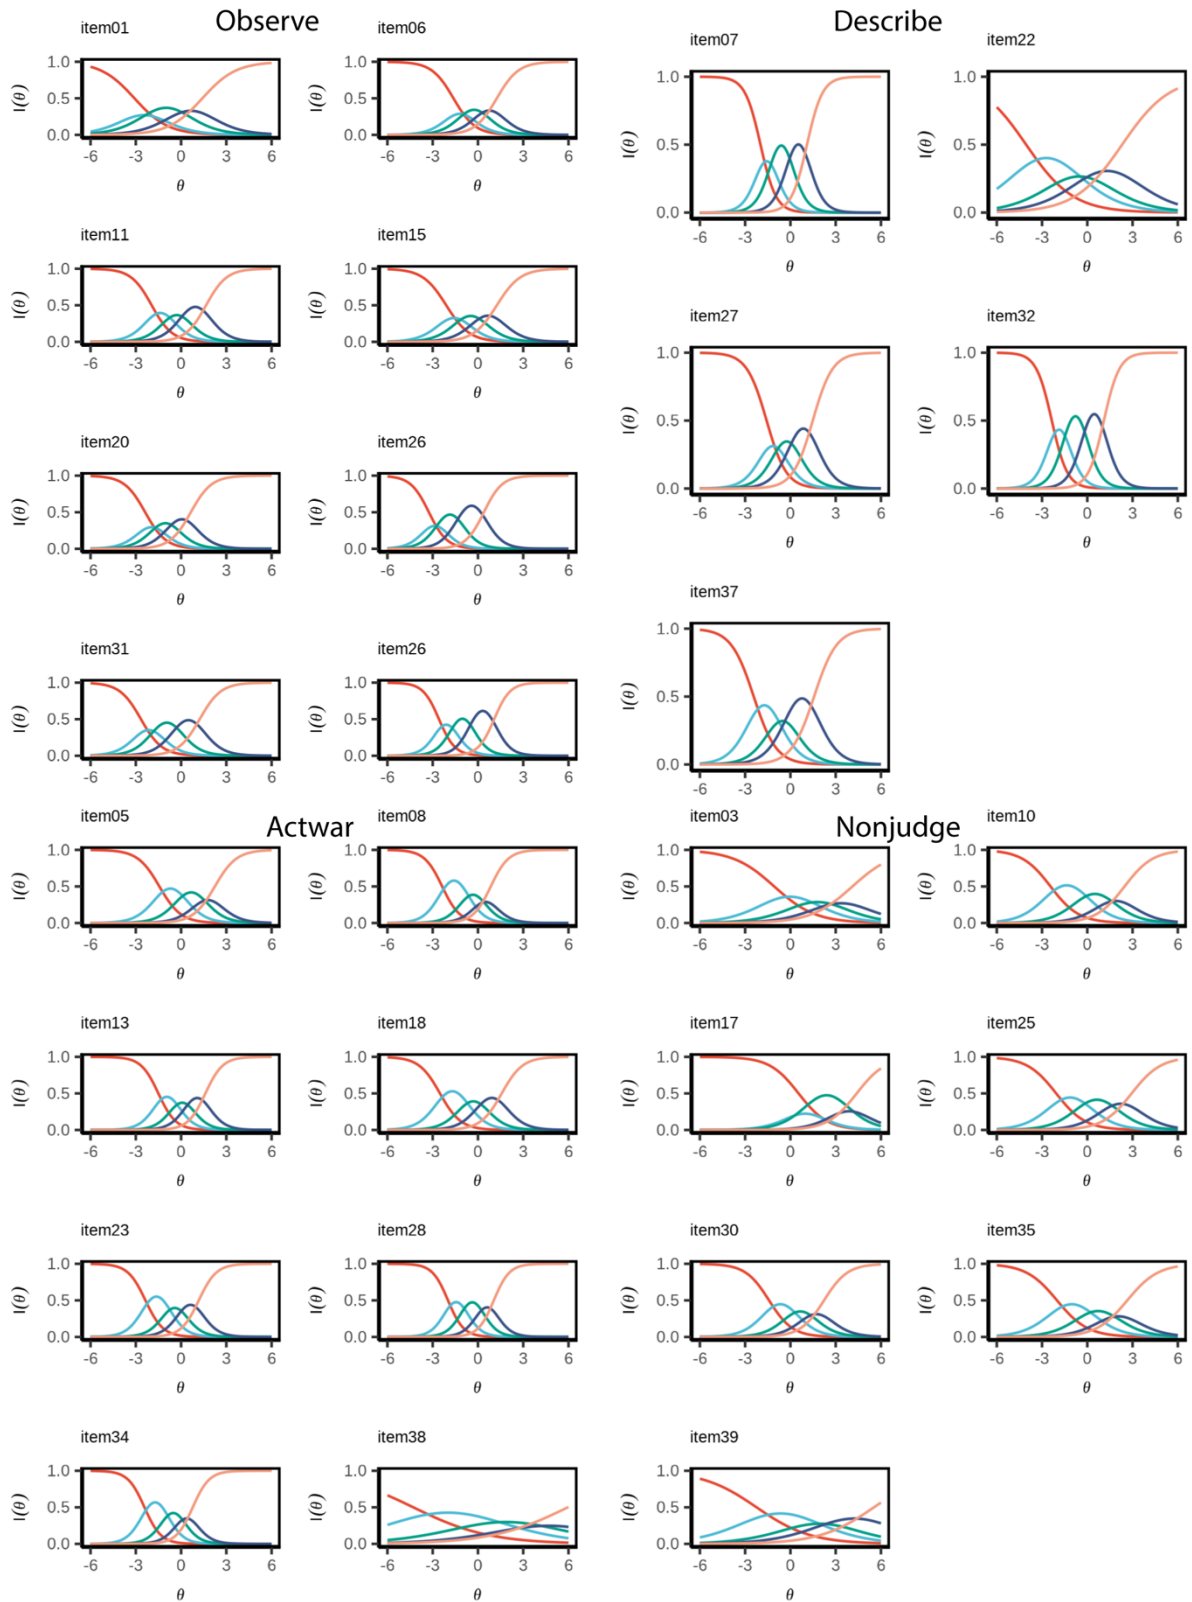

S.Fig.1 Option Characteristics curve

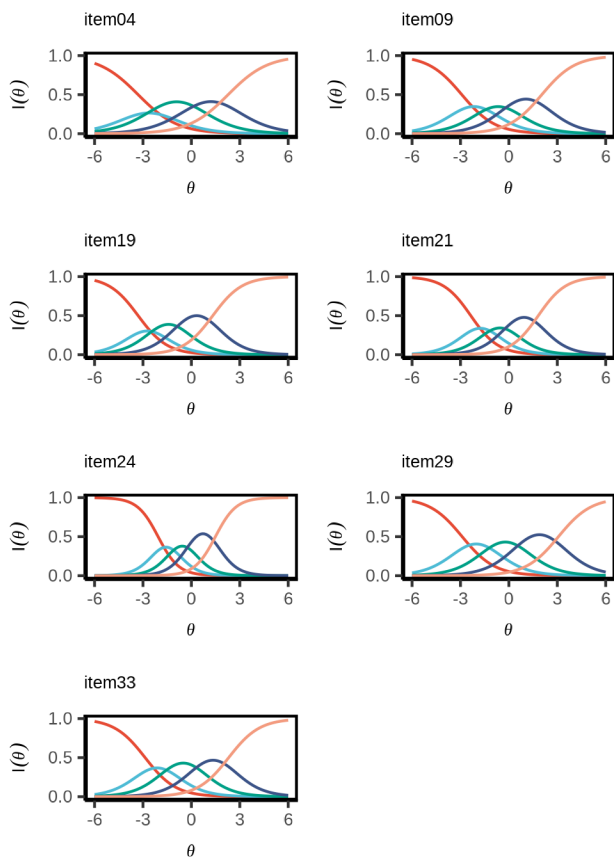

Fig. S1 Option Characteristics curve (Continued)
